# Supplementary material for: A Novel Protocol for the Synthesis of 1,2,4-Oxadiazoles Active against Trypanosomatids and Drug-Resistant Leukemia Cell Lines
Source: MDPI journal article supplement (doi:10.3390/tropicalmed7120403), 2022-11-28

## Supplemental Material

### 1. Copies of $^1\text{H}$ and DEPTQ $^{13}\text{C}$ NMR spectra for compounds 9–25

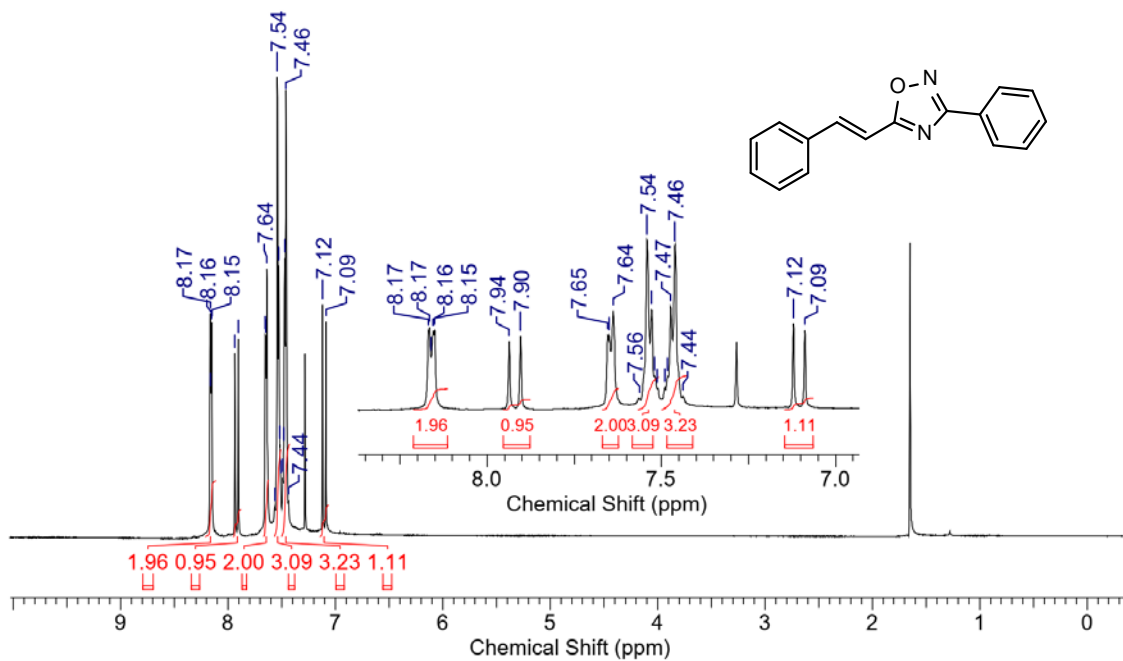

Figure S1. –  $^1\text{H}$  NMR spectrum of compound 9.

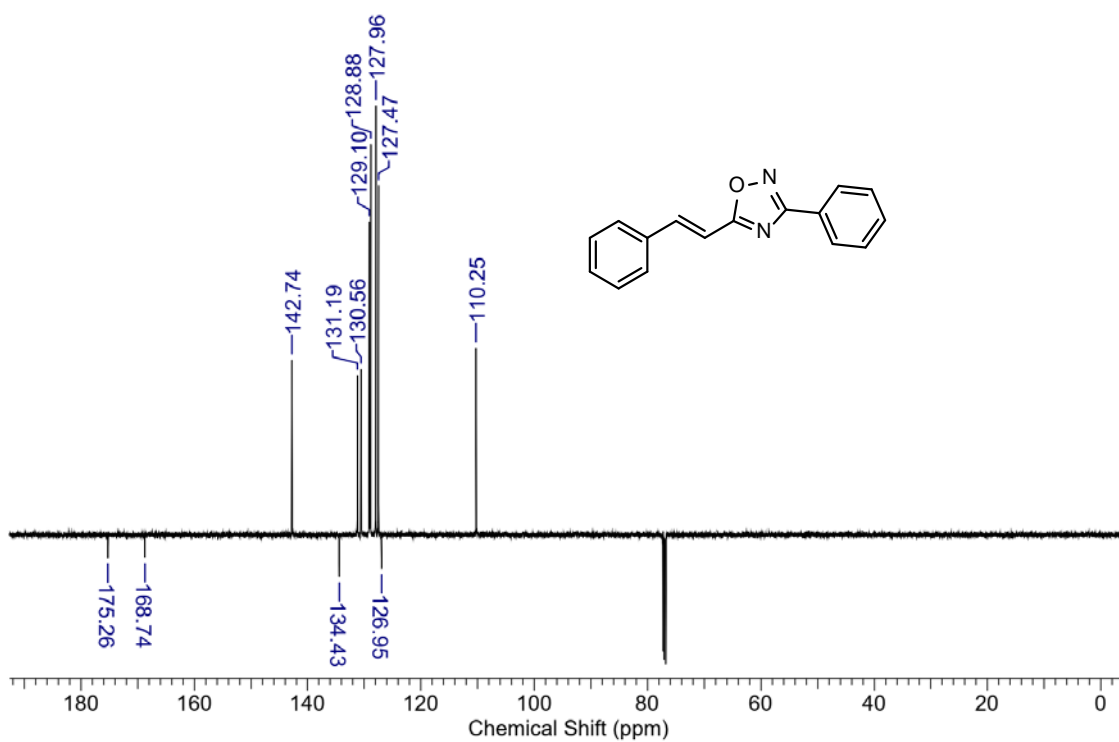

Figure S2. – DEPTQ  $^{13}\text{C}$  NMR spectrum of compound 9.

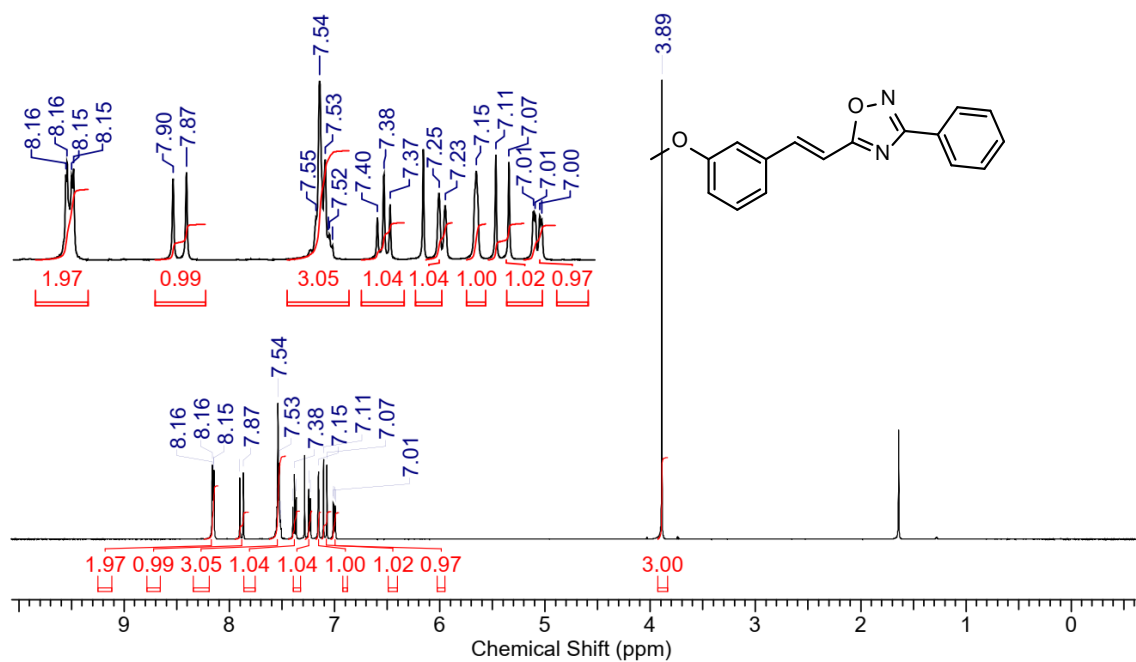

Figure S3. – <sup>1</sup>H NMR spectrum of compound **10**.

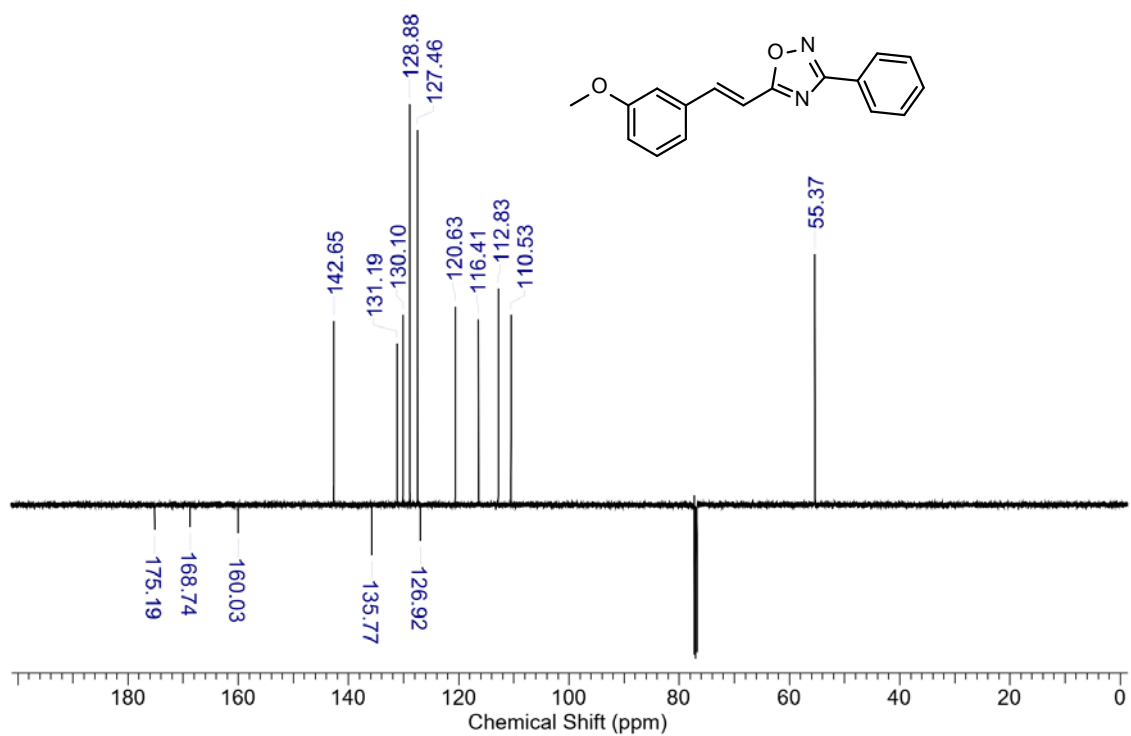

Figure S4. – DEPTQ <sup>13</sup>C NMR spectrum of compound **10**.

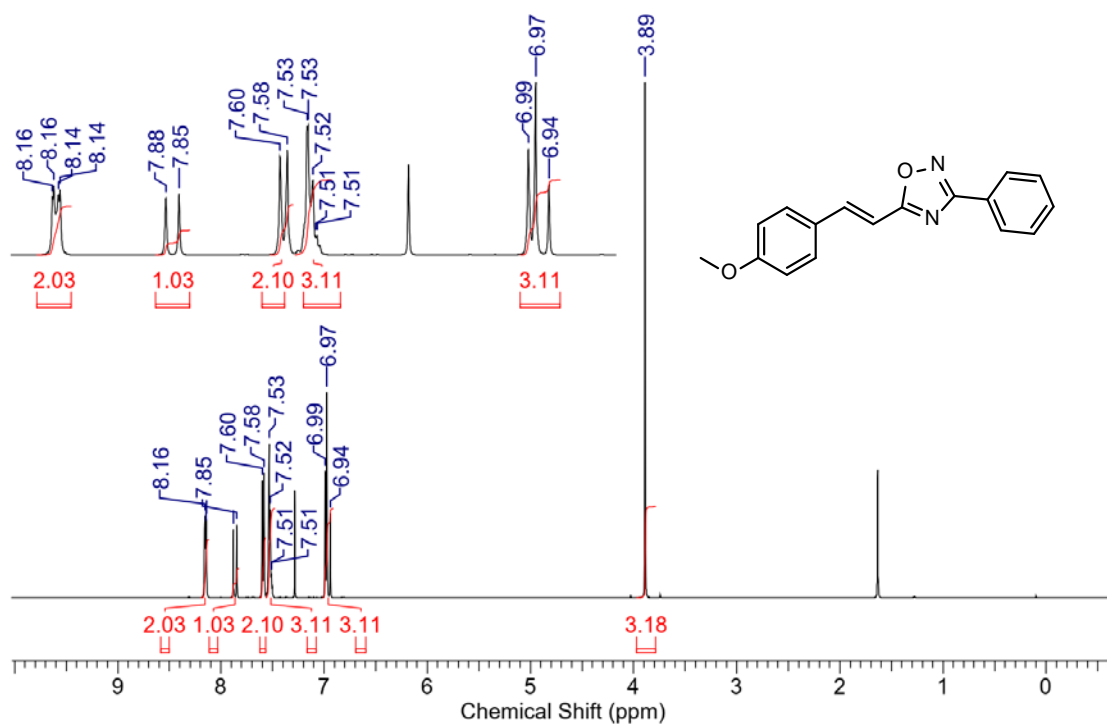

Figure S5. – <sup>1</sup>H NMR spectrum of compound **11**.

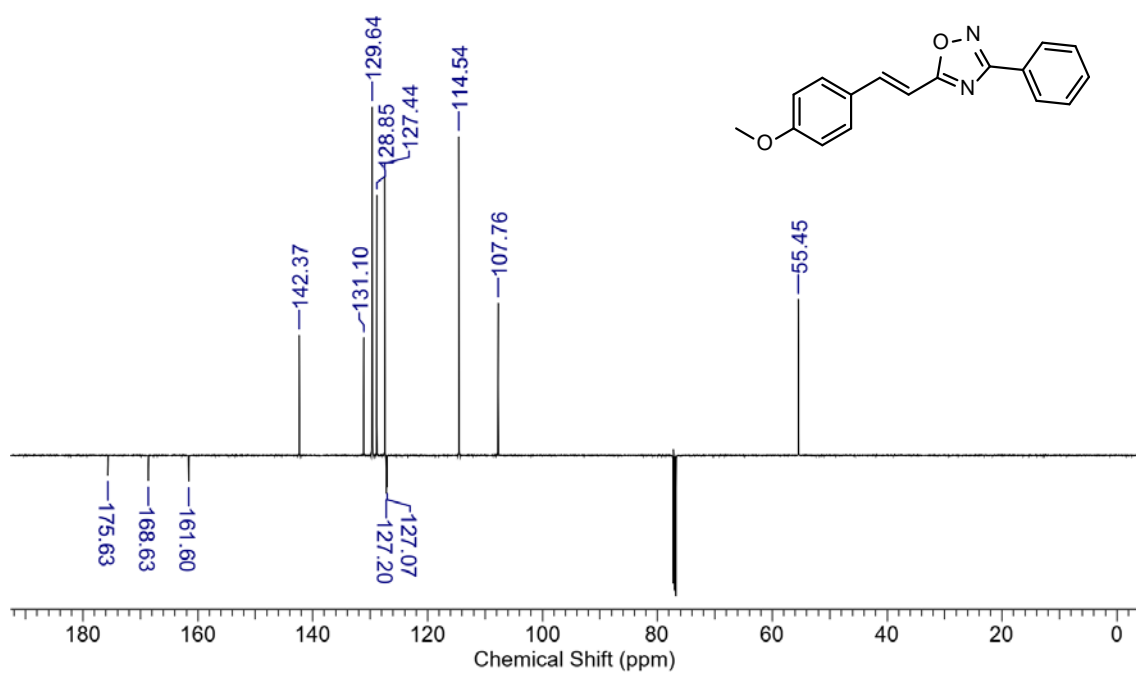

Figure S6. – DEPTQ <sup>13</sup>C NMR spectrum of compound **11**.

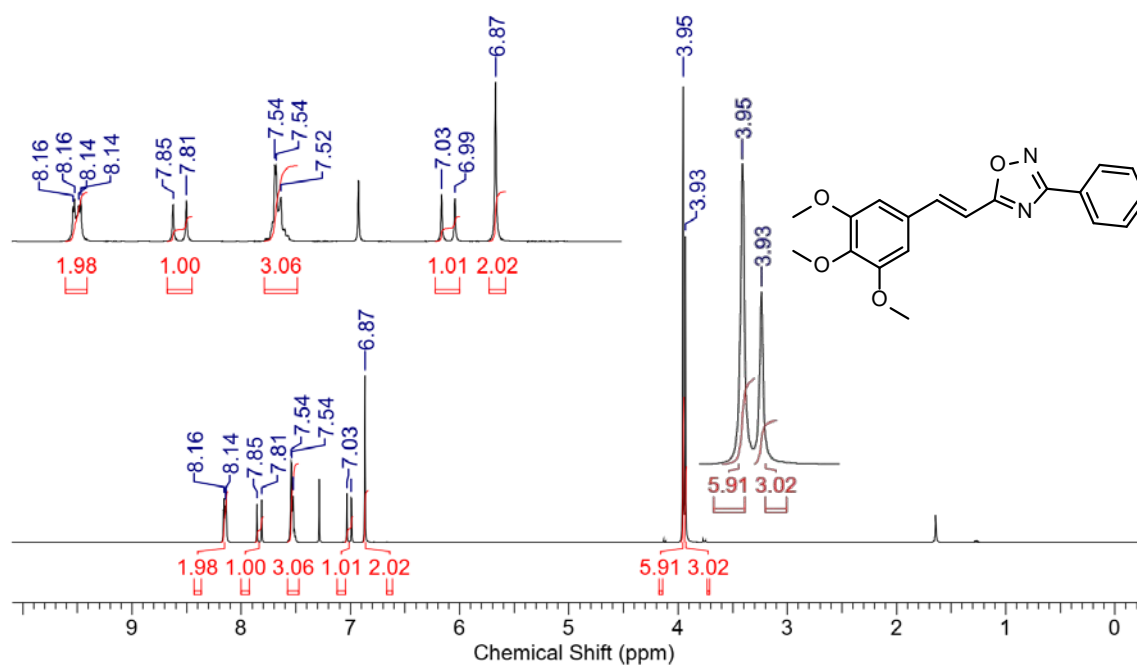

Figure S7. – <sup>1</sup>H NMR spectrum of compound **12**.

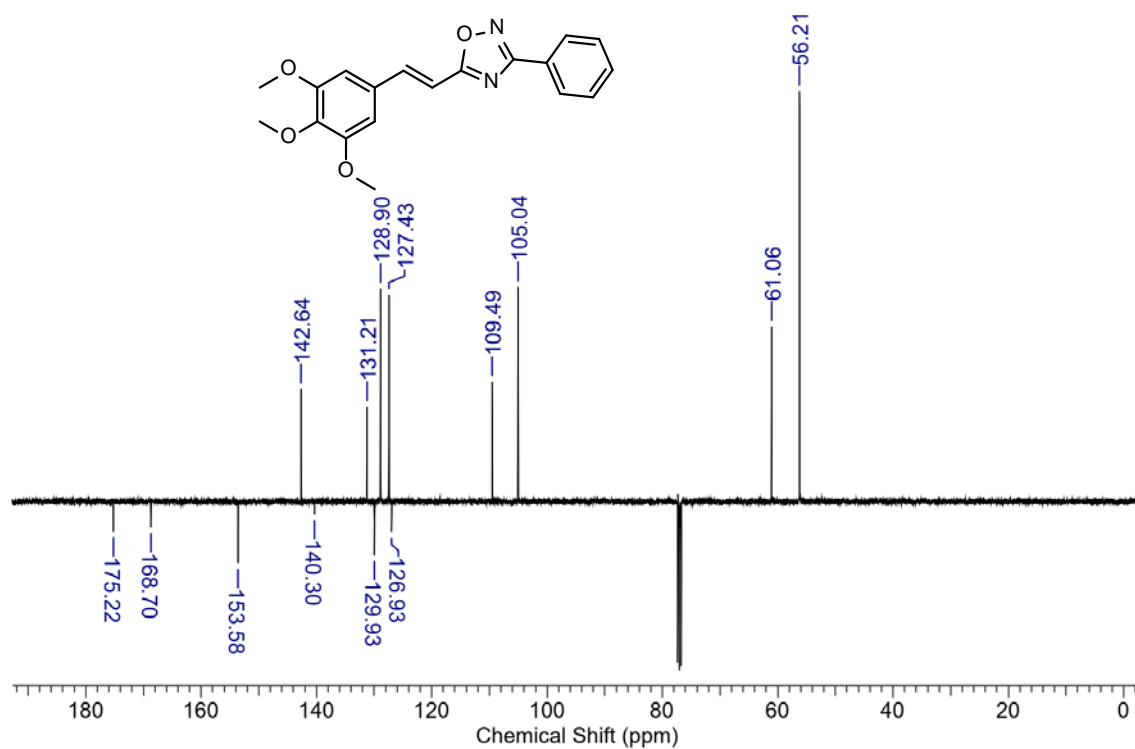

Figure S8. – DEPTQ <sup>13</sup>C NMR spectrum of compound **12**.

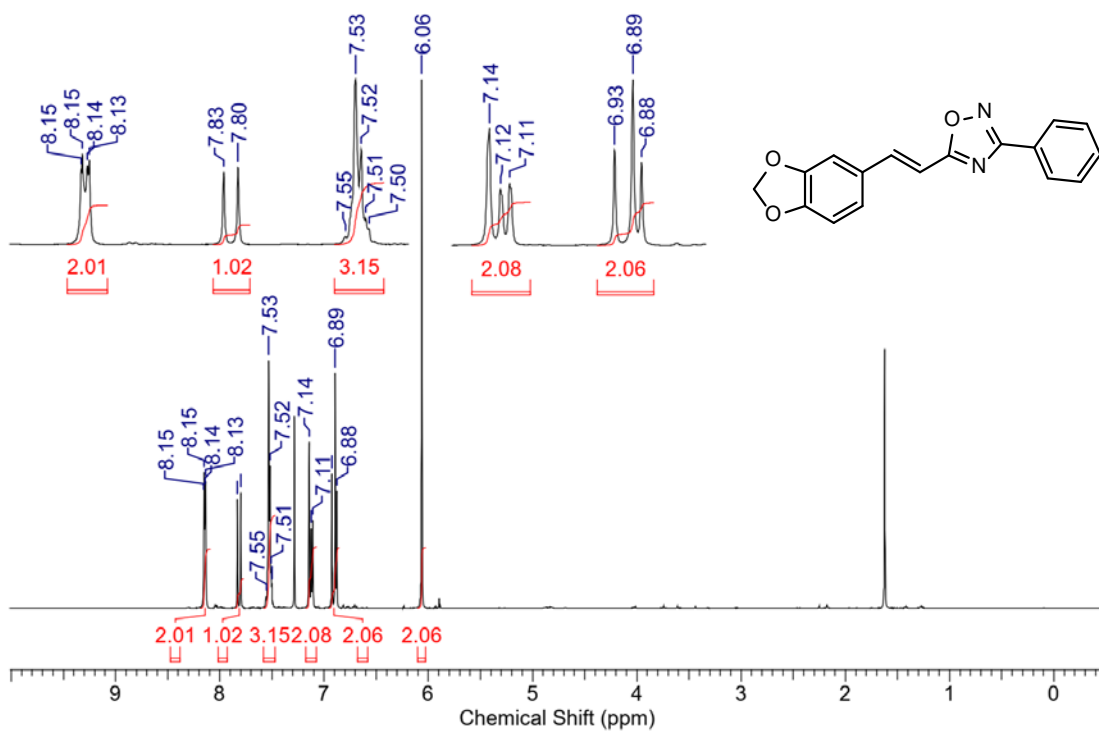

Figure S9. – <sup>1</sup>H NMR spectrum of compound **13**.

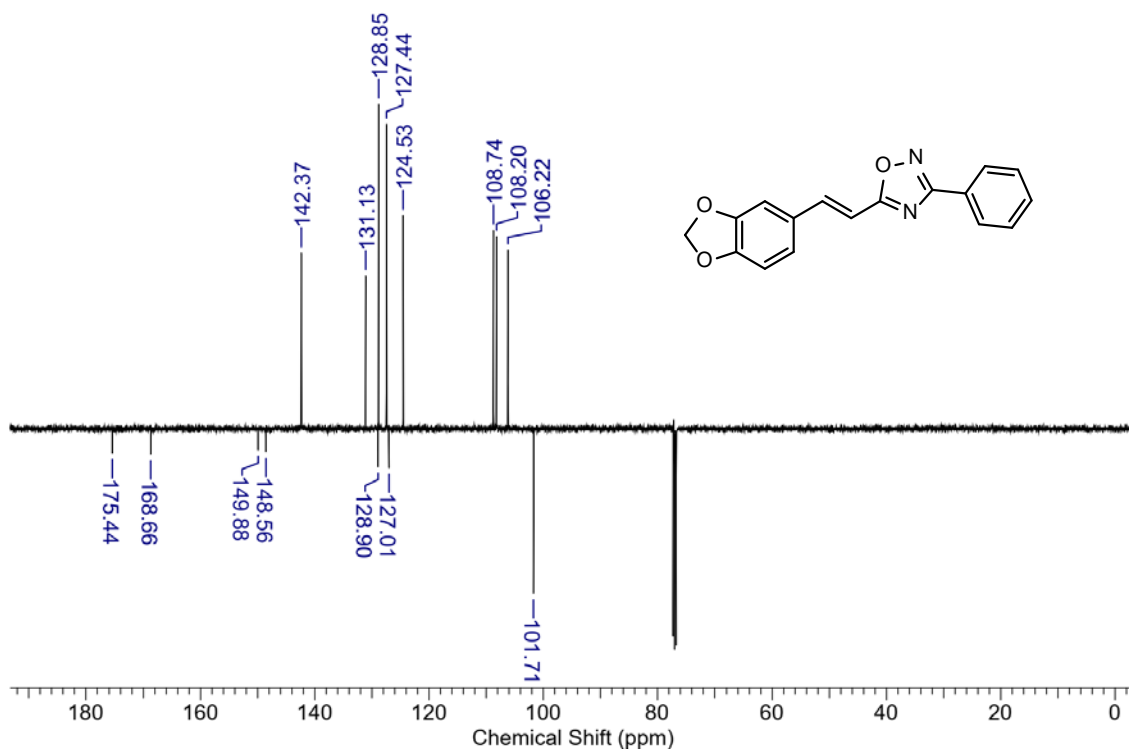

Figure S10. – DEPTQ <sup>13</sup>C NMR spectrum of compound **13**.

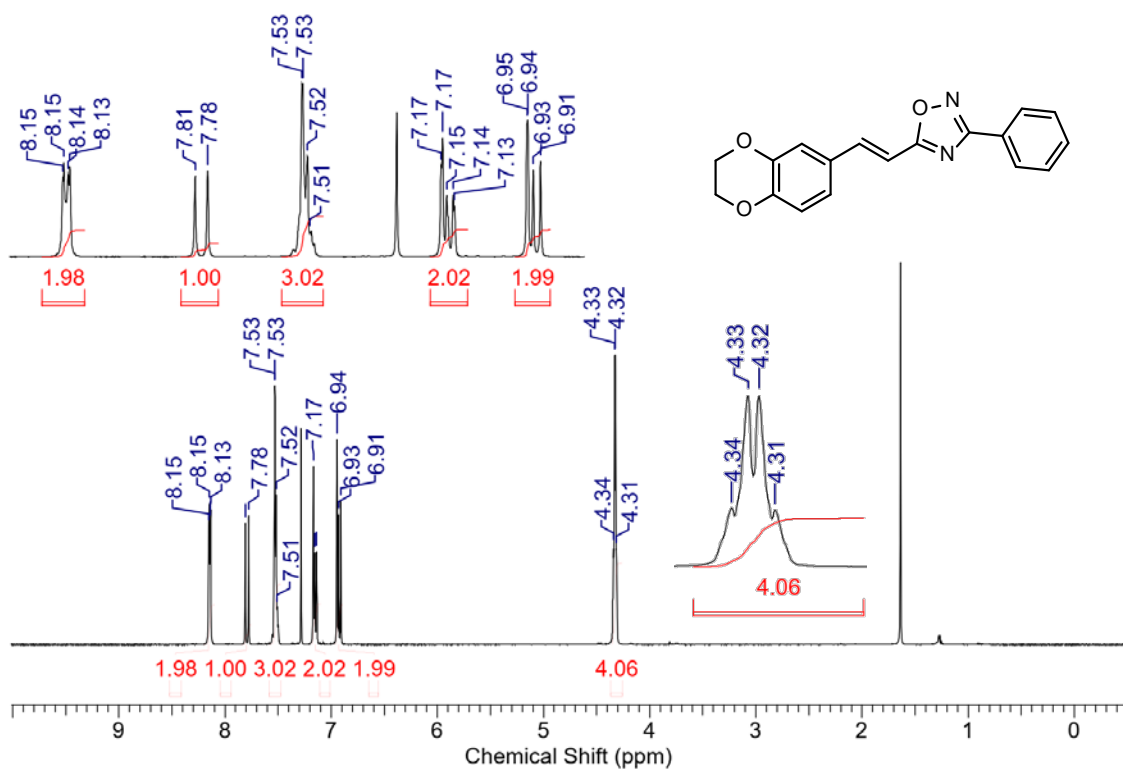

Figure S11. – <sup>1</sup>H NMR spectrum of compound **14**.

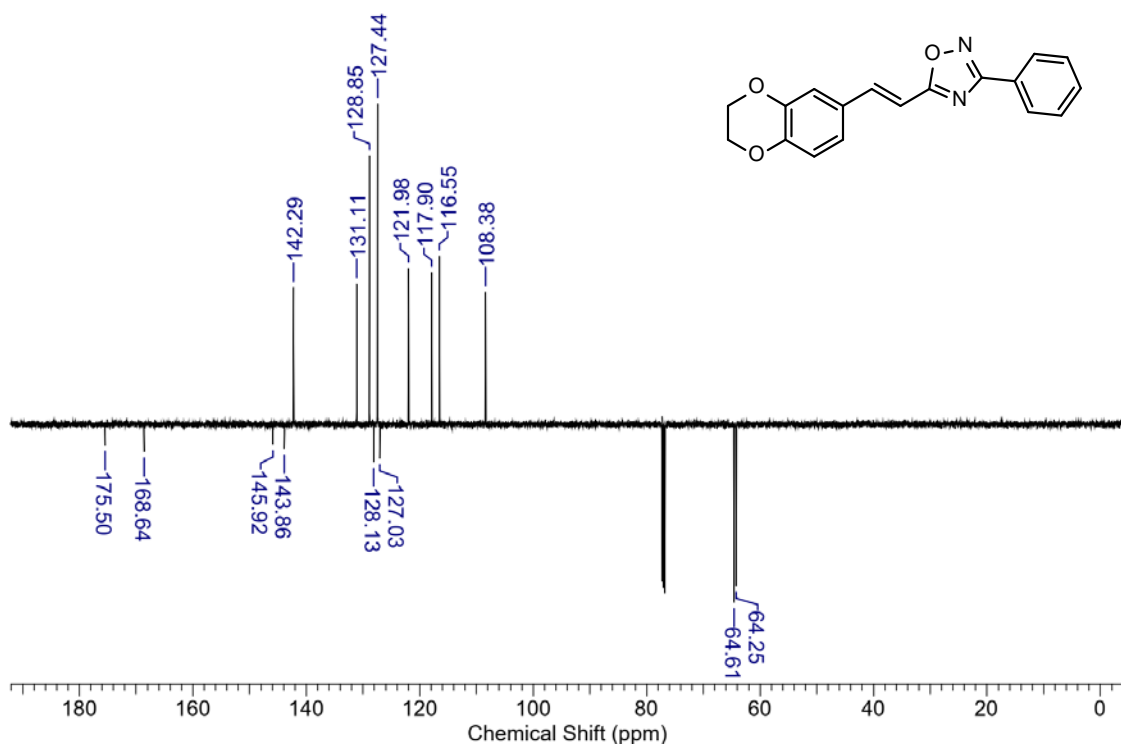

Figure S12. – DEPTQ <sup>13</sup>C NMR spectrum of compound **14**.

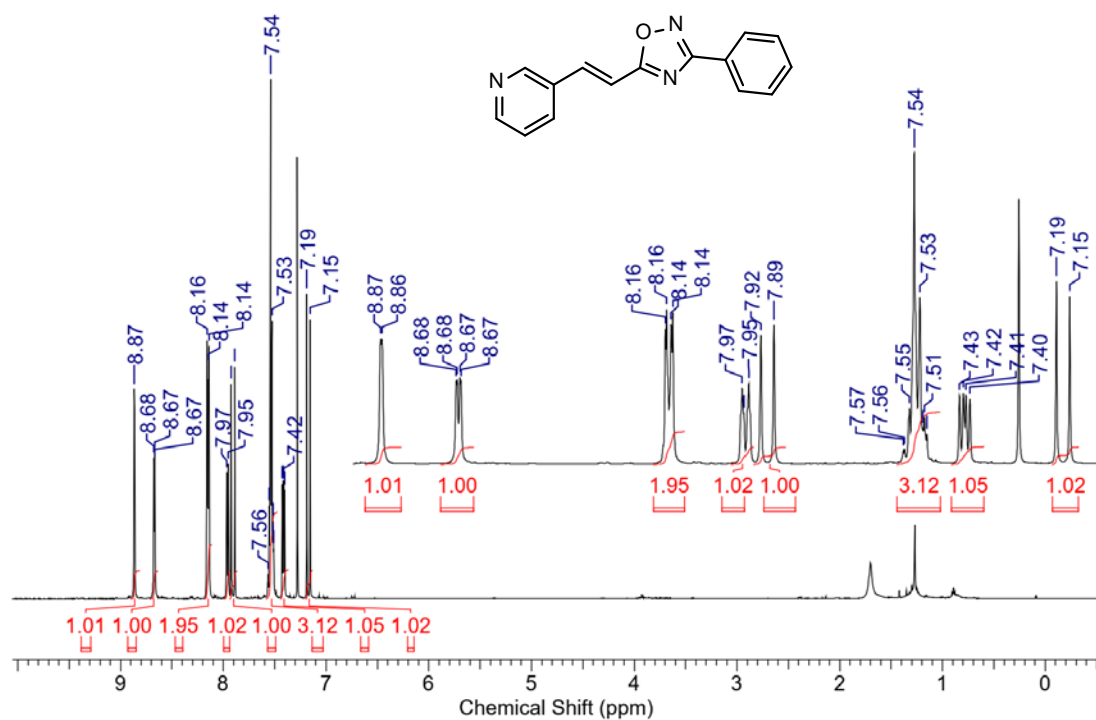

Figure S13. – <sup>1</sup>H NMR spectrum of compound **15**.

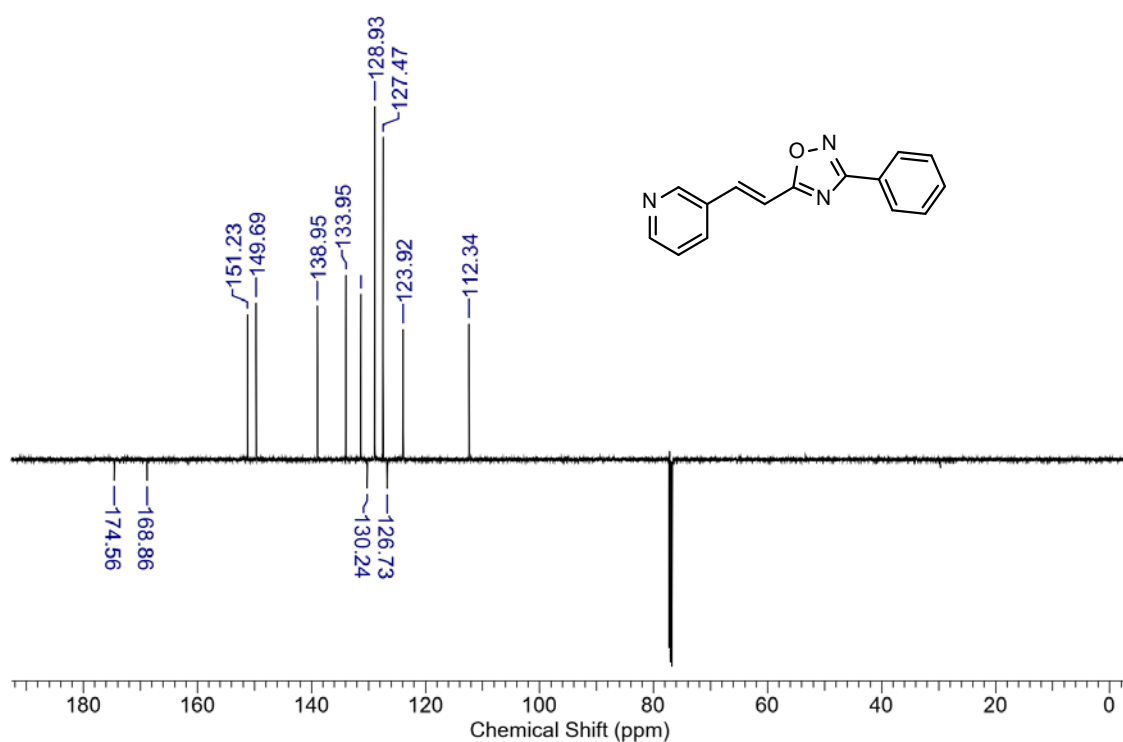

Figure S14. – DEPTQ <sup>13</sup>C NMR spectrum of compound **15**.



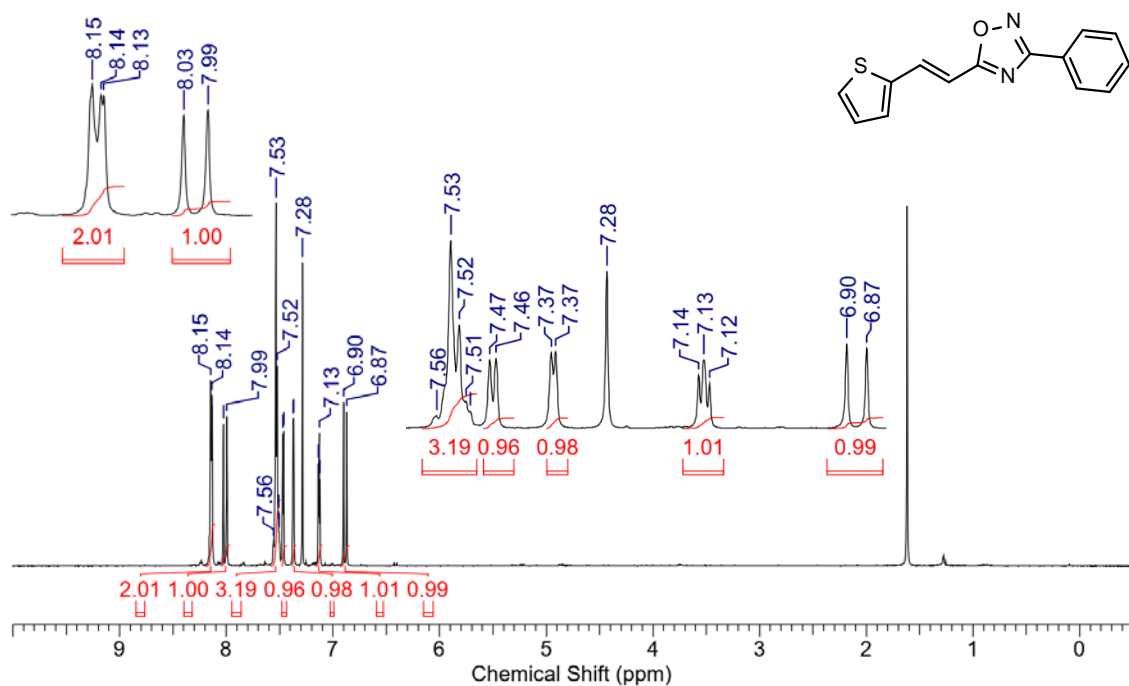

Figure S17. – <sup>1</sup>H NMR spectrum of compound **17**.

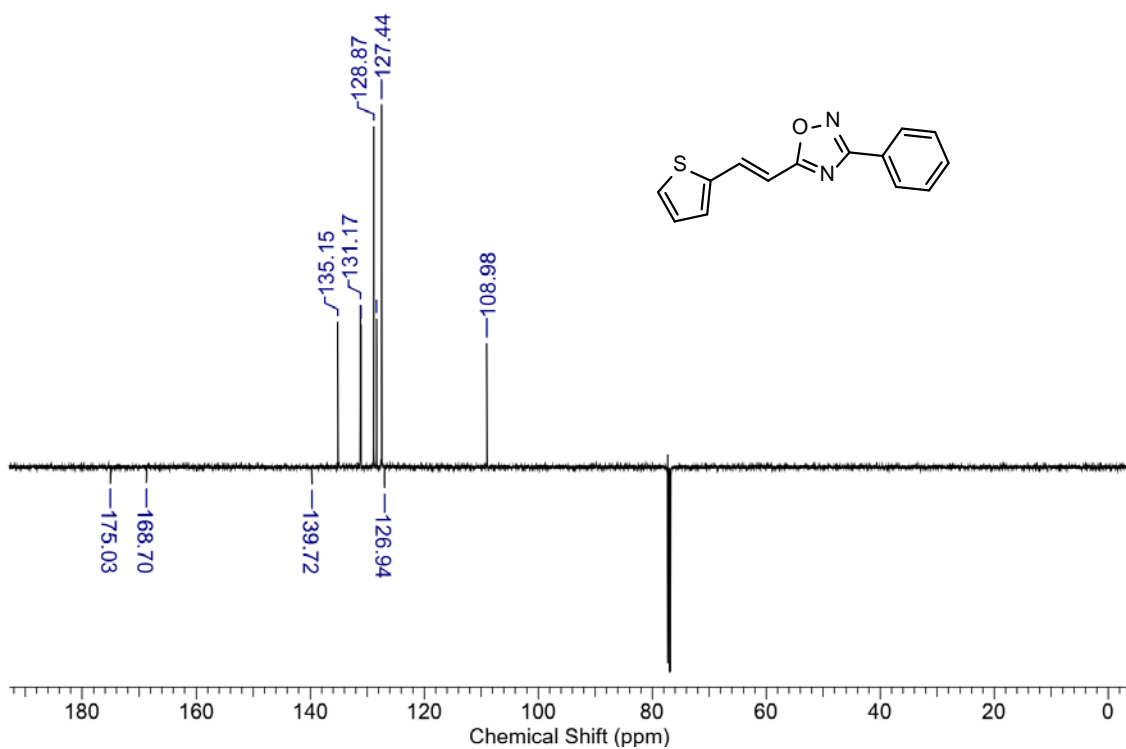

Figure S18. – DEPTQ <sup>13</sup>C NMR spectrum of compound **17**.

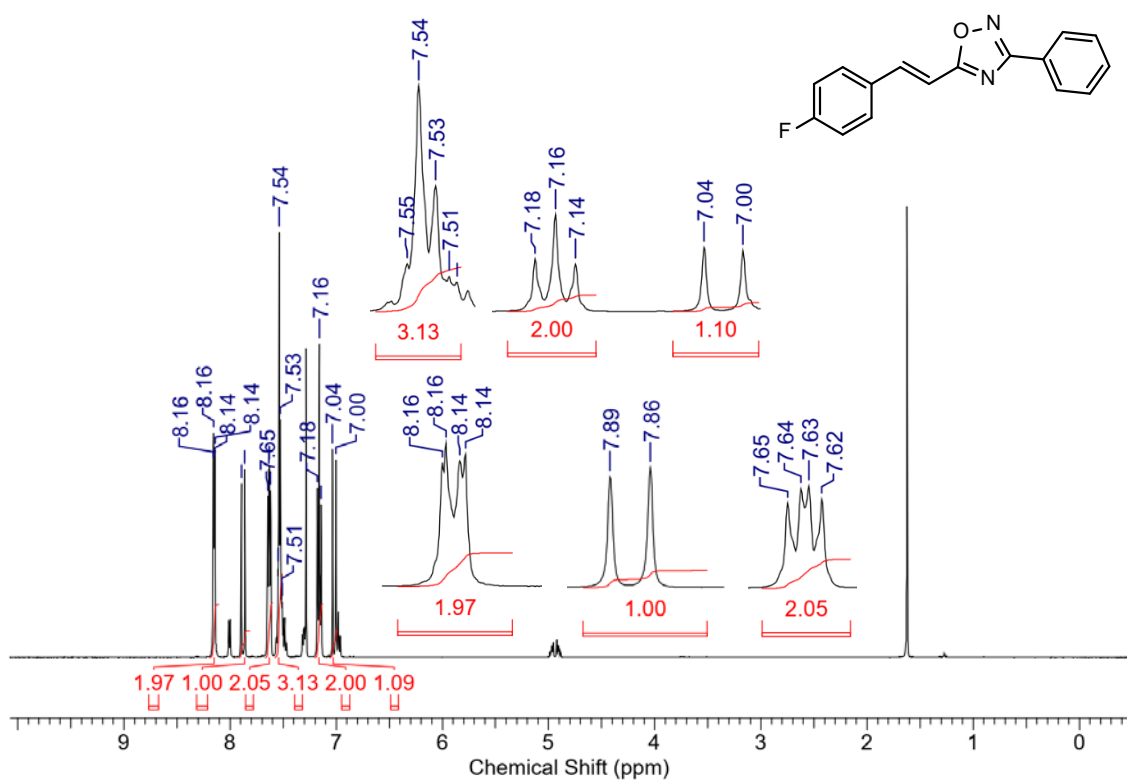

Figure S19. – <sup>1</sup>H NMR spectrum of compound **18**.

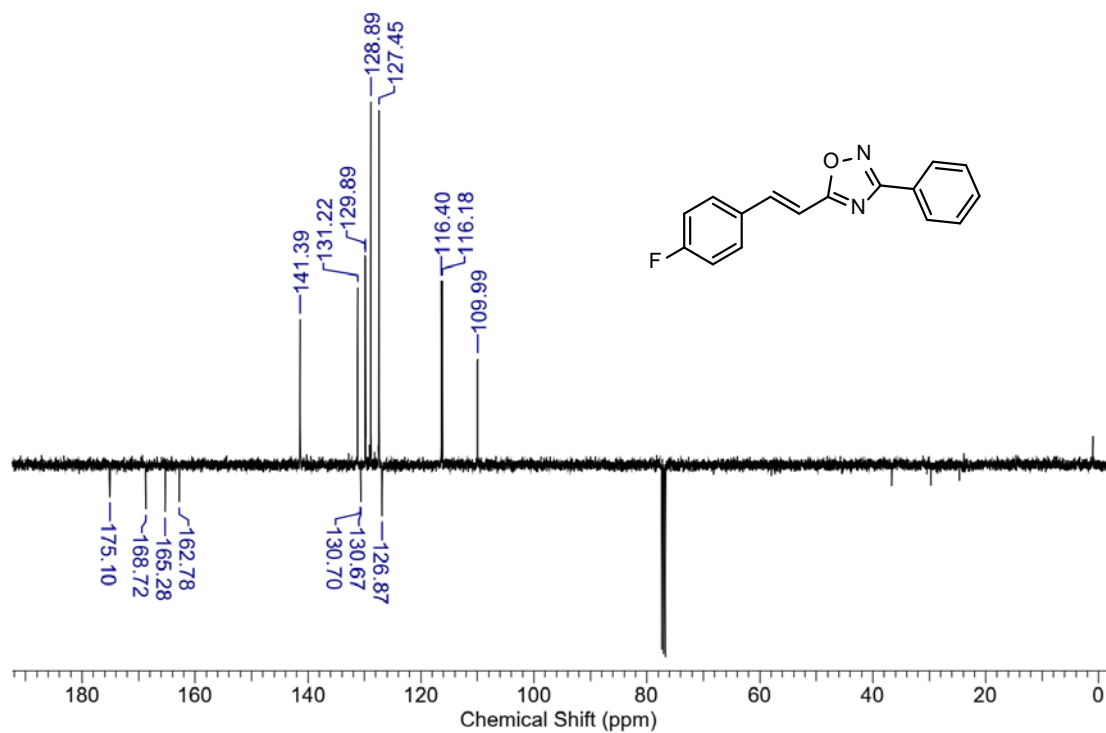

Figure S20. – DEPTQ <sup>13</sup>C NMR spectrum of compound **18** .

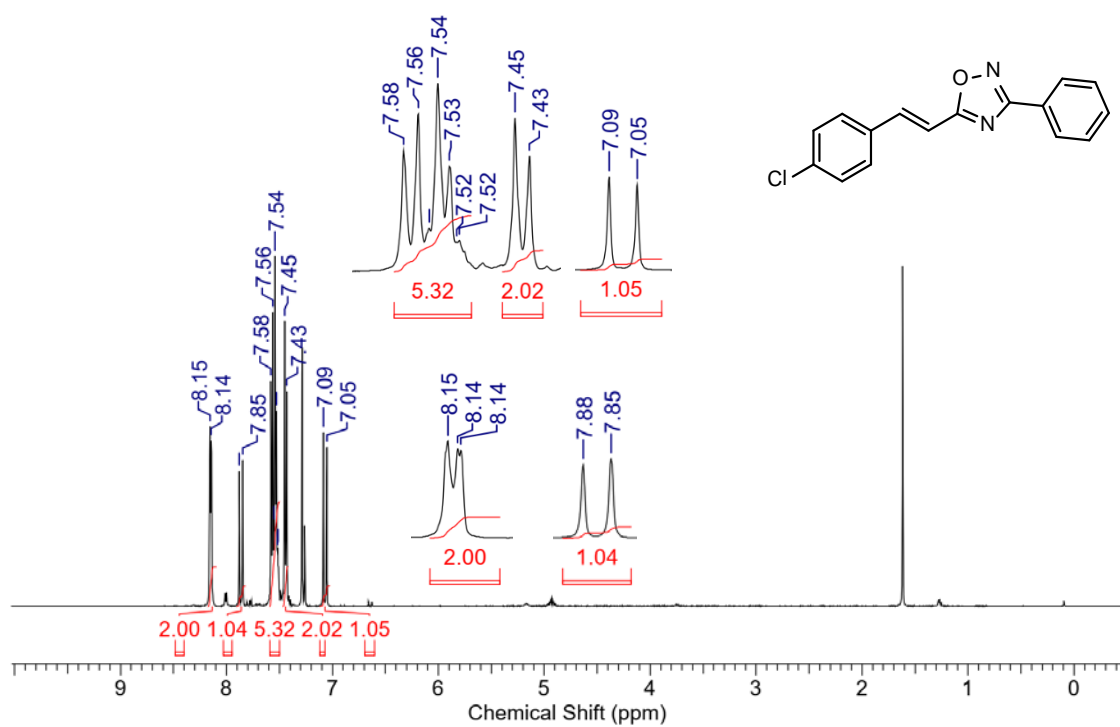

Figure S21. – <sup>1</sup>H NMR spectrum of compound **19**.

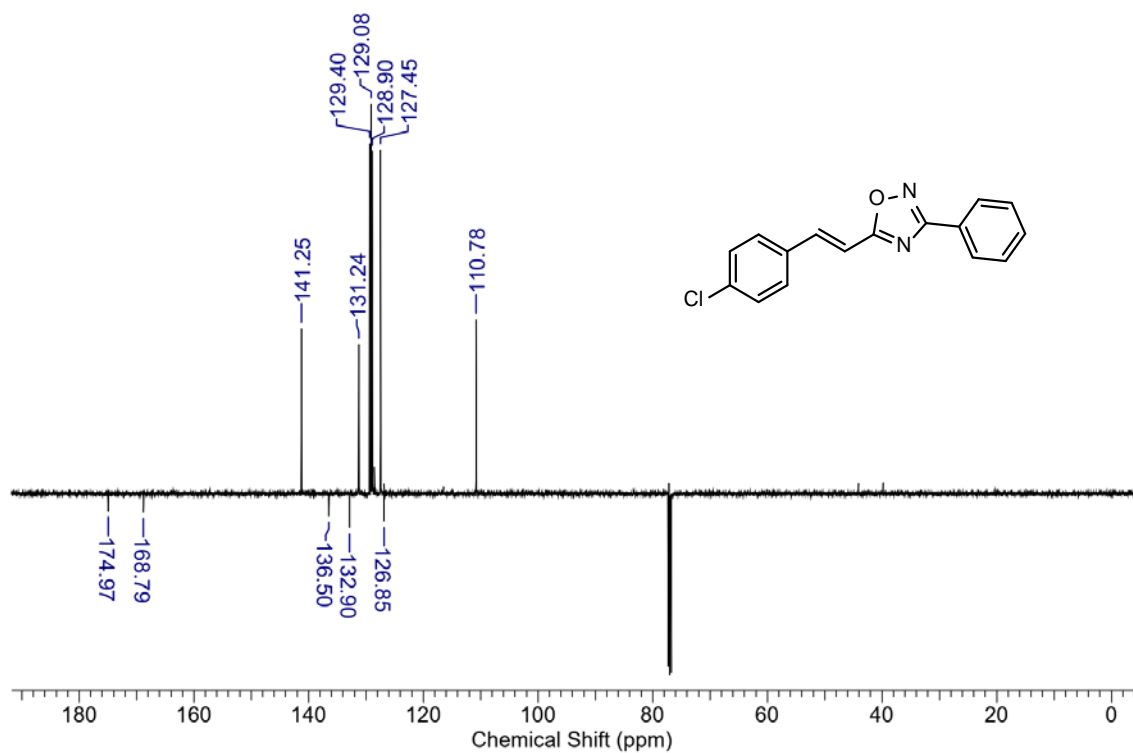

Figure S22. – DEPTQ <sup>13</sup>C NMR spectrum of compound **19**.

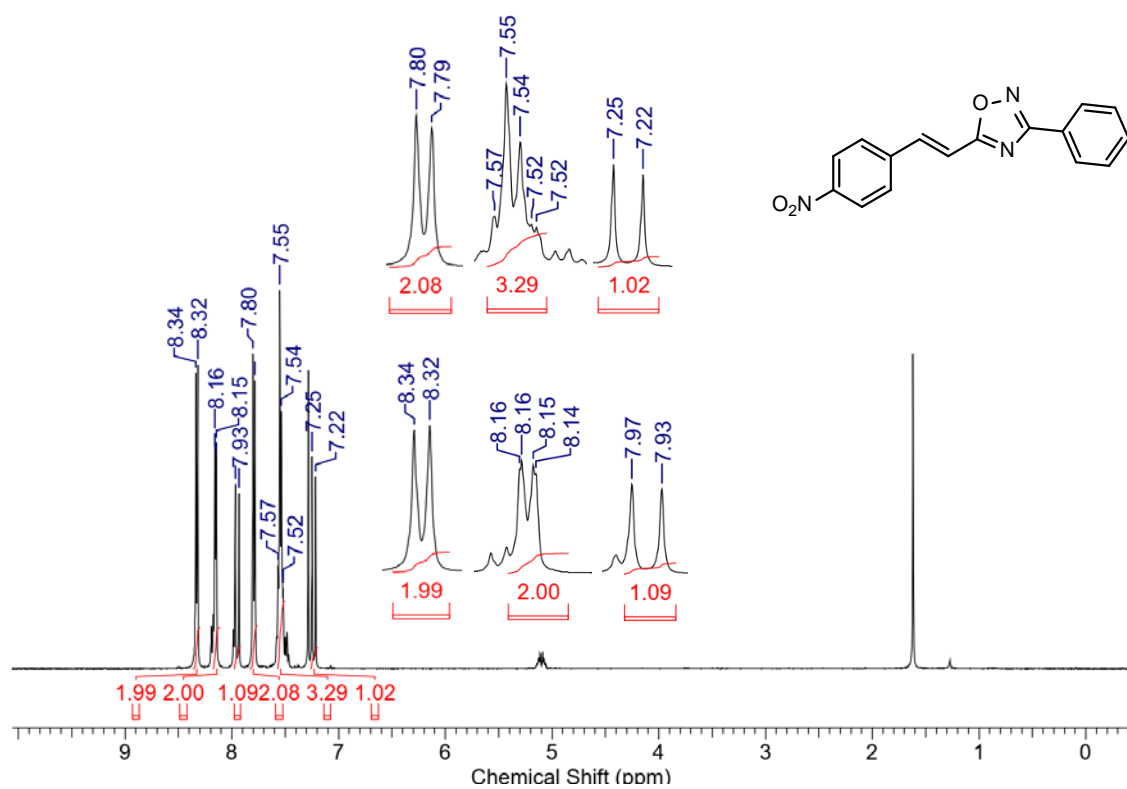

Figure S23. – <sup>1</sup>H NMR spectrum of compound 20.

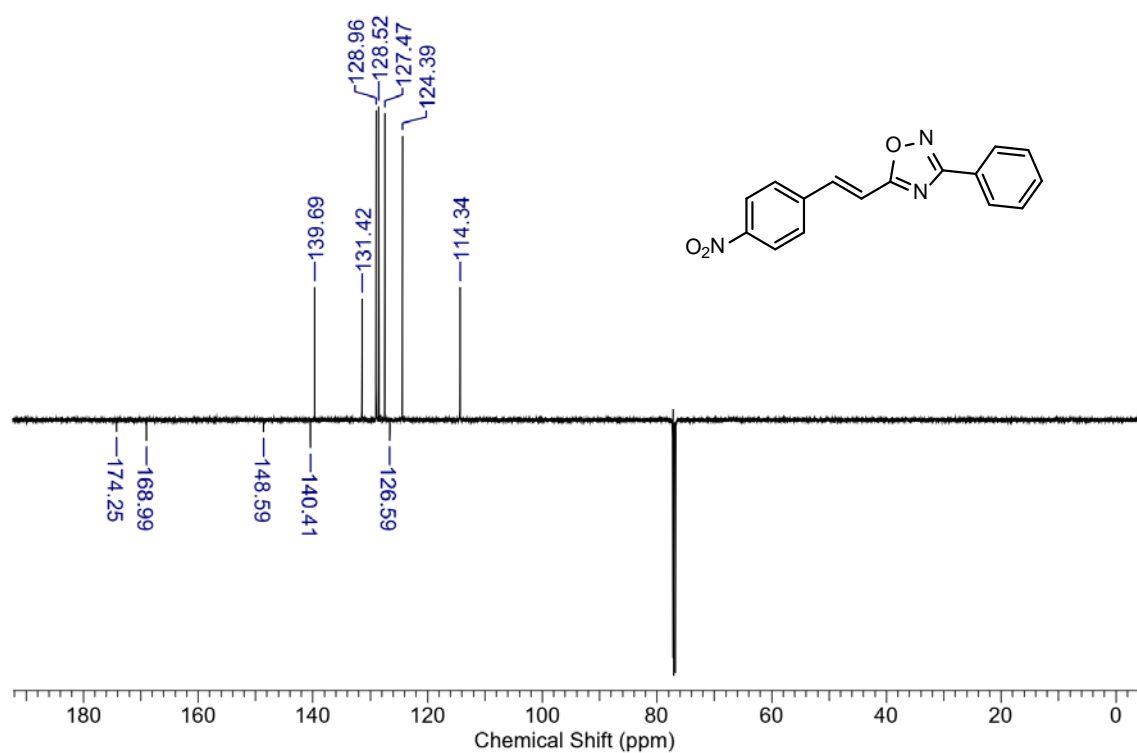

Figure S24. – DEPTQ <sup>13</sup>C NMR spectrum of compound 20.

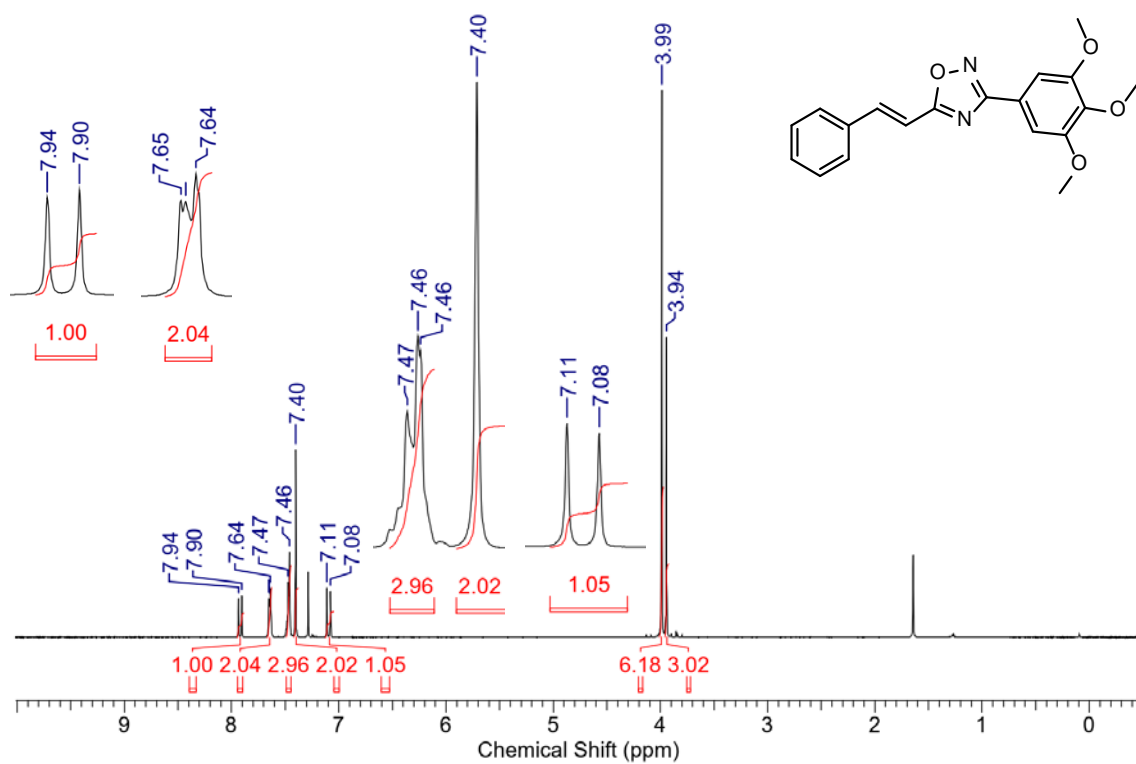

Figure S25. – <sup>1</sup>H NMR spectrum of compound **21**.

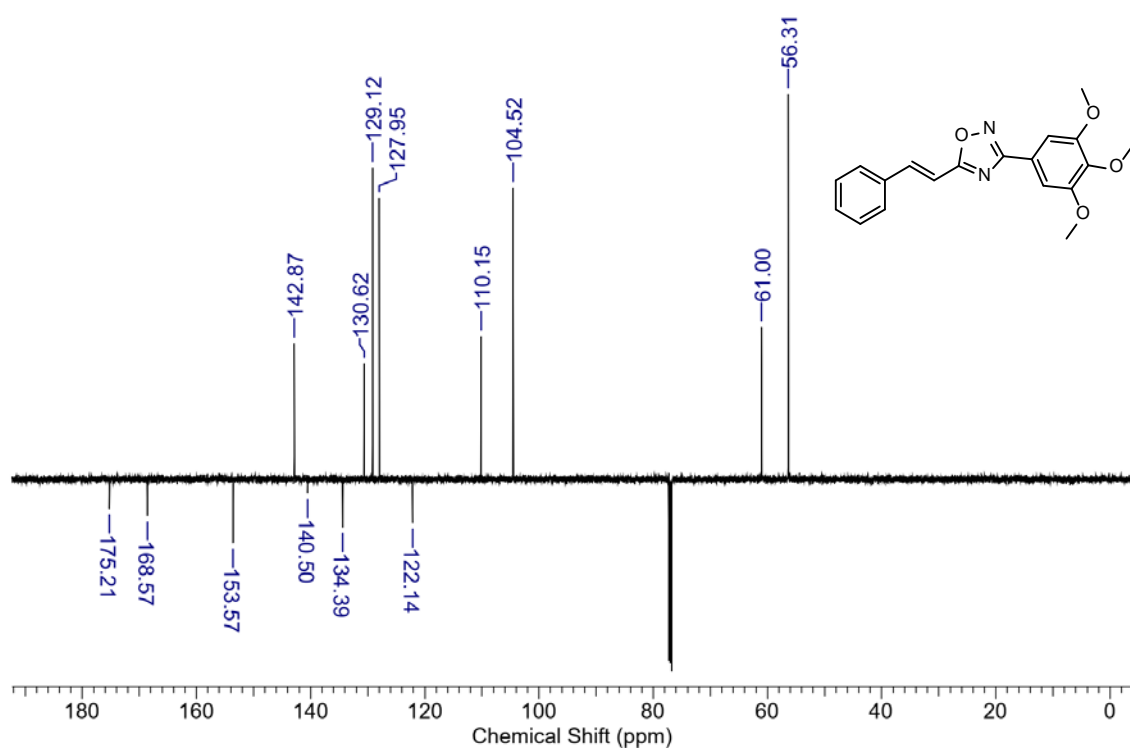

Figure S26. – DEPTQ <sup>13</sup>C NMR spectrum of compound **21**.

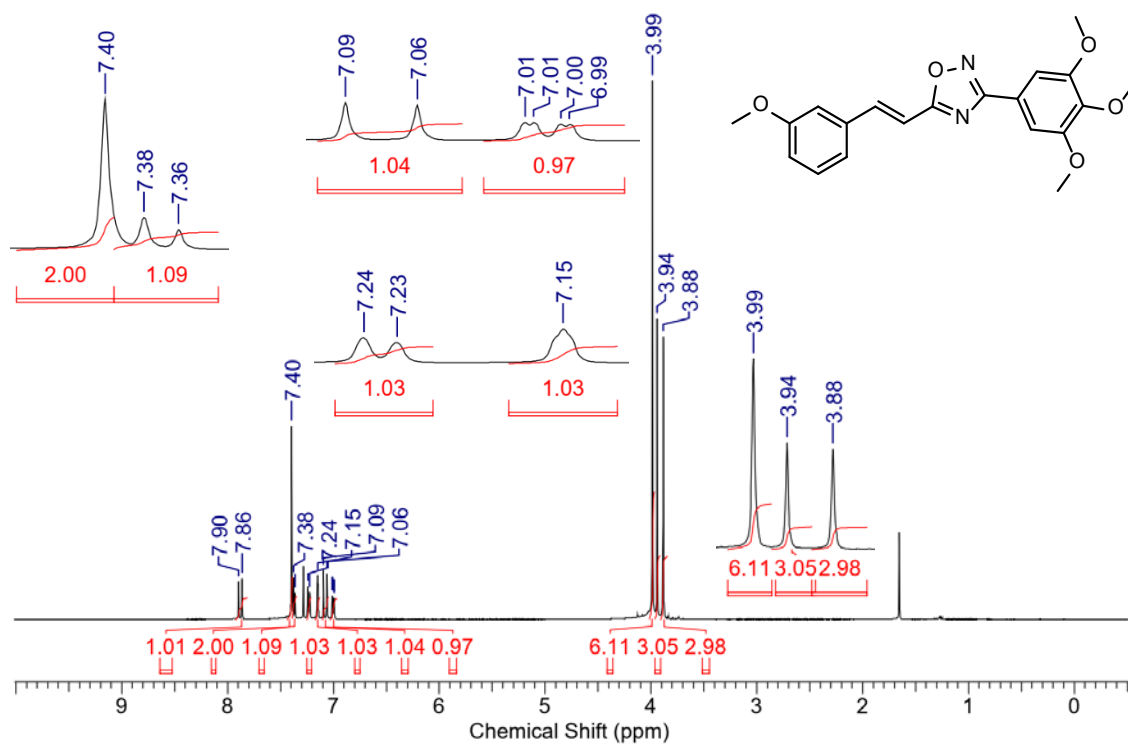

Figure S27. – <sup>1</sup>H NMR spectrum of compound **22**.

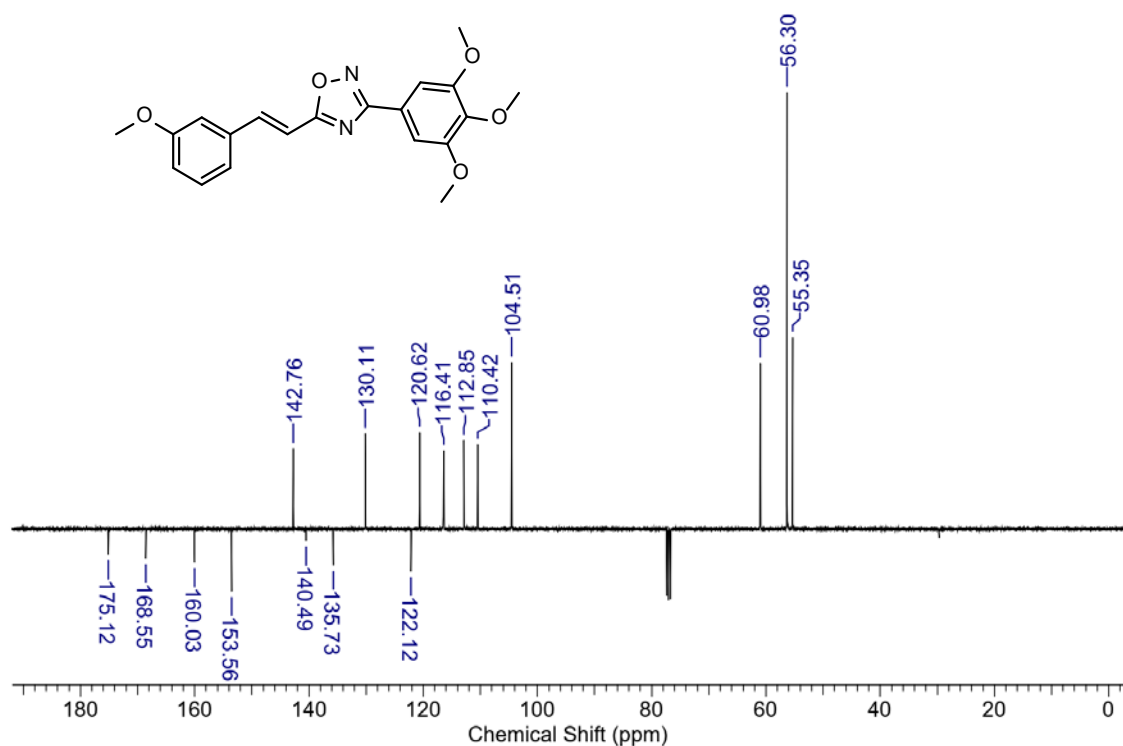

Figure S28. – DEPTQ <sup>13</sup>C NMR spectrum of compound **22**.

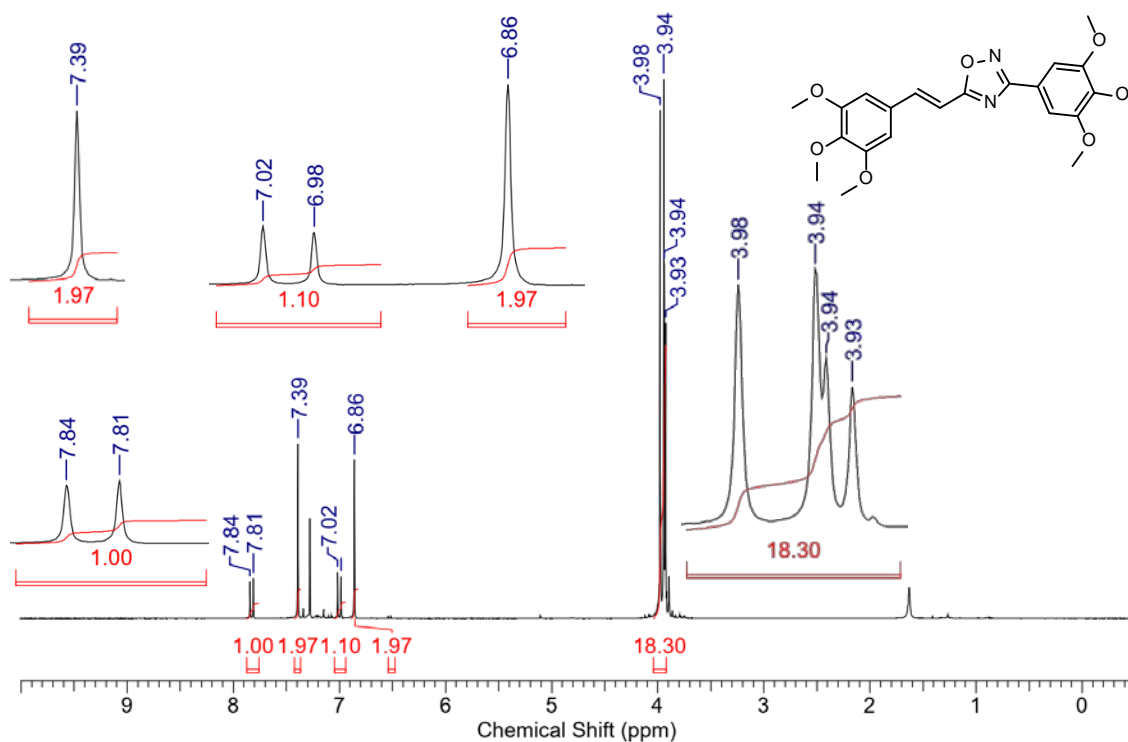

Figure S29. – <sup>1</sup>H NMR spectrum of compound **23**.

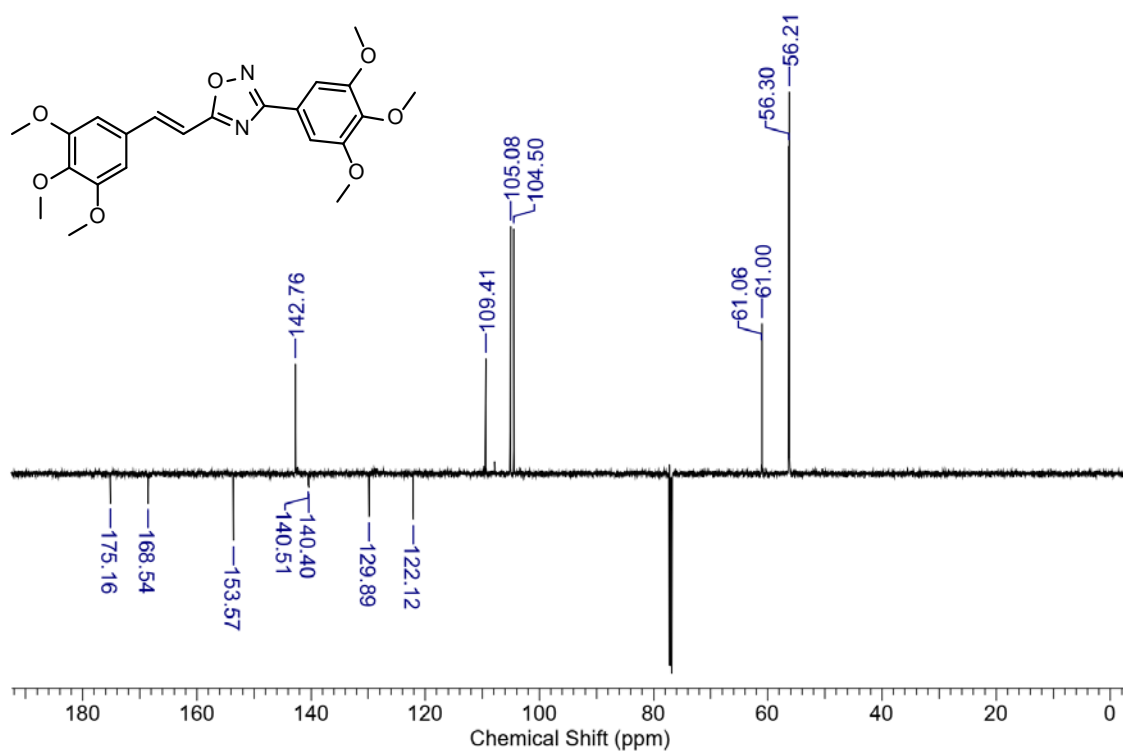

Figure S30. – DEPTQ <sup>13</sup>C NMR spectrum of compound **23**.

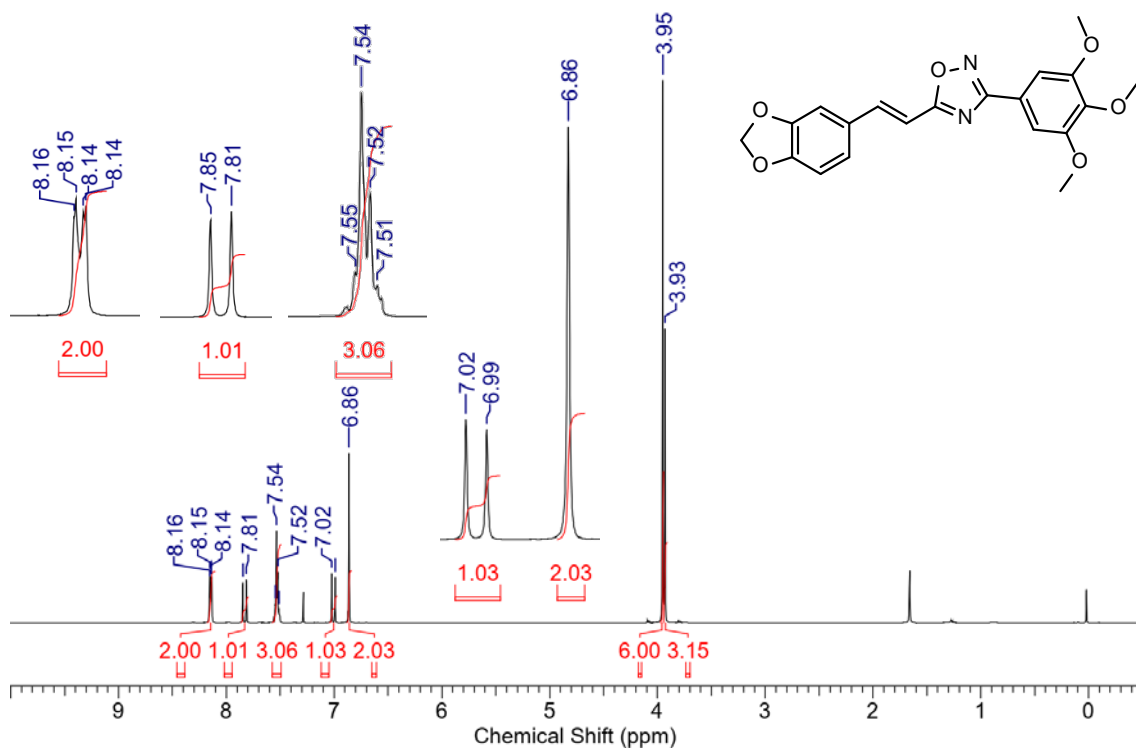

Figure S31. – <sup>1</sup>H NMR spectrum of compound **24**.

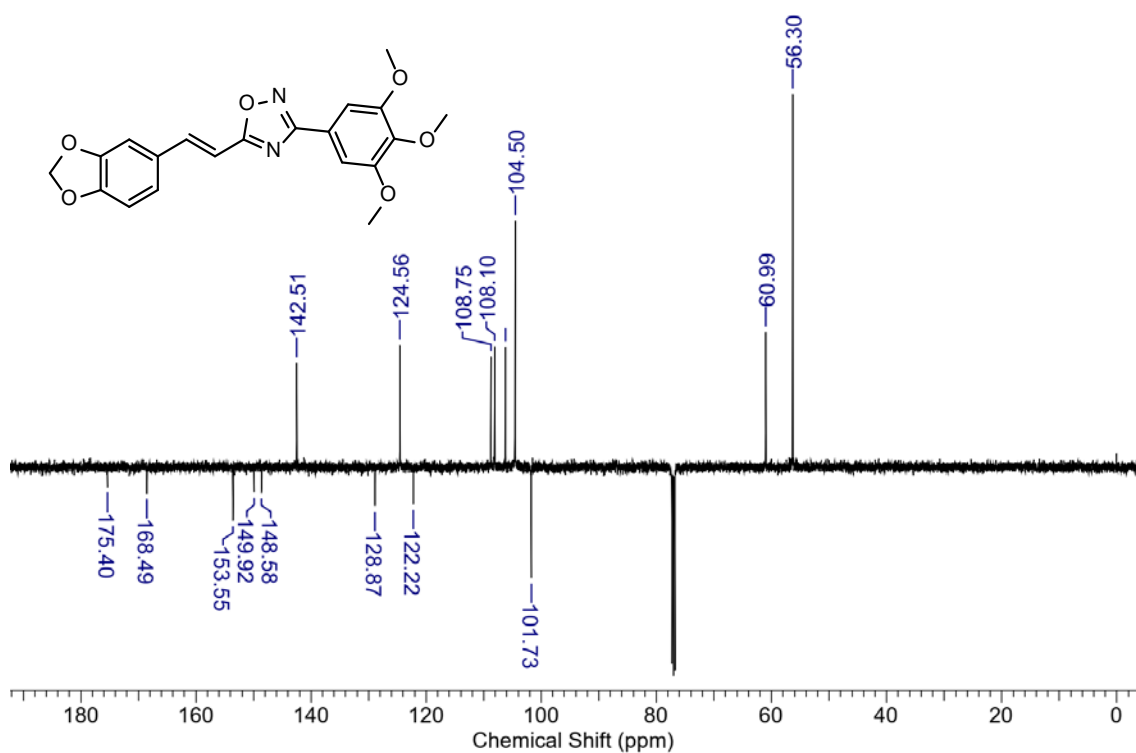

Figure S32. – DEPTQ <sup>13</sup>C NMR spectrum of compound **24**.

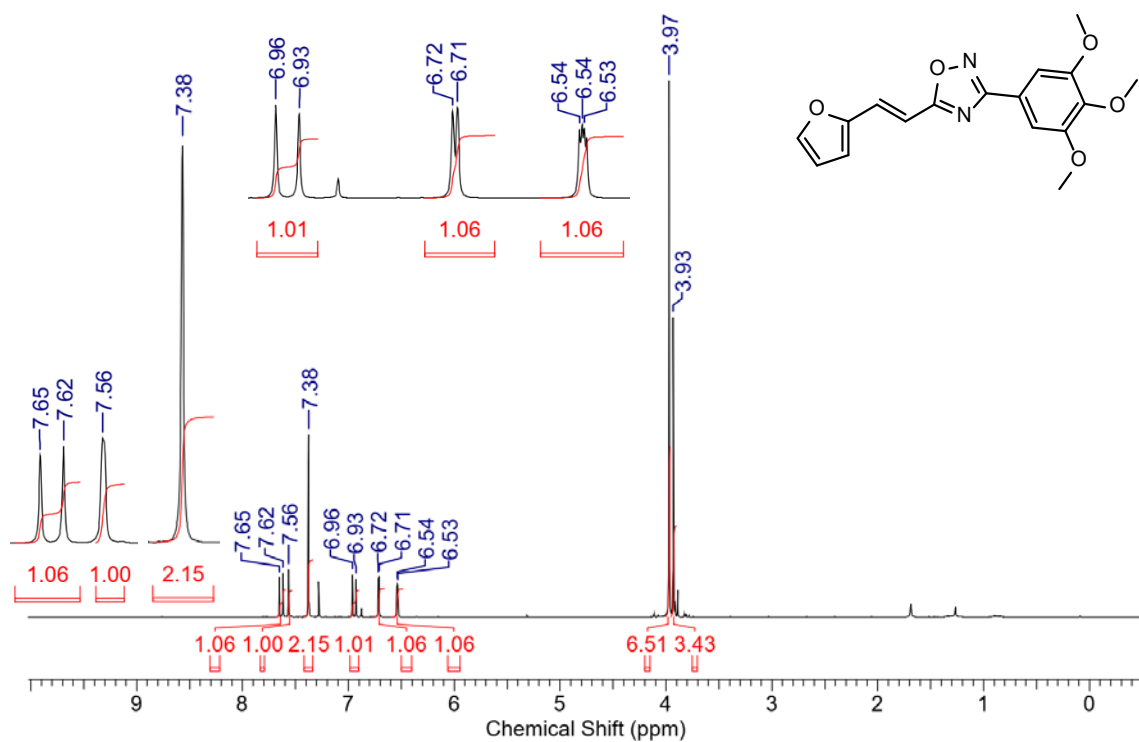

Figure S33. – <sup>1</sup>H NMR spectrum of compound **25**.

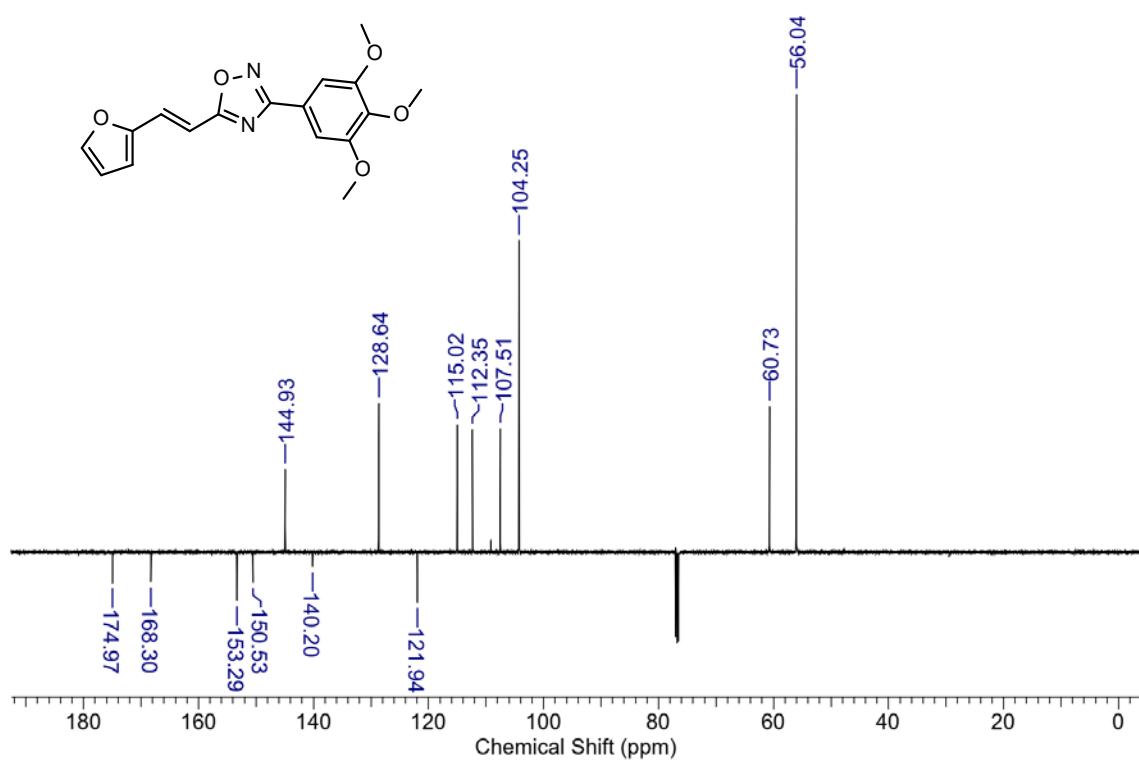

Figure S34. – DEPTQ <sup>13</sup>C NMR spectrum of compound **25**.

**Table S1.** *In vitro* percent viability of mouse splenocytes after treatment with compounds **15** – **31** at 100  $\mu$ M compared to the untreated control.

| Compound  | % Viability <sup>a</sup> | Compound  | % Viability      |
|-----------|--------------------------|-----------|------------------|
| <b>9</b>  | 102.1 $\pm$ 7.4          | <b>18</b> | 101.5 $\pm$ 11.5 |
| <b>10</b> | 85.4 $\pm$ 4.0           | <b>19</b> | 90.5 $\pm$ 5.3   |
| <b>11</b> | 84.4 $\pm$ 2.9           | <b>20</b> | 77.8 $\pm$ 4.2   |
| <b>12</b> | 72.1 $\pm$ 6.5           | <b>21</b> | 76.8 $\pm$ 6.6   |
| <b>13</b> | 98.8 $\pm$ 5.1           | <b>22</b> | 63.5 $\pm$ 2.4   |
| <b>14</b> | 93.6 $\pm$ 5.9           | <b>23</b> | 14.1 $\pm$ 3.5   |
| <b>15</b> | 29.5 $\pm$ 1.6           | <b>24</b> | 72.8 $\pm$ 4.2   |
| <b>16</b> | 53.5 $\pm$ 5.2           | <b>25</b> | 63.7 $\pm$ 4.7   |
| <b>17</b> | 99.0 $\pm$ 8.4           |           |                  |

<sup>a</sup> Compared to the untreated control

**Table S2.** *In vitro* dose-dependent viability of mouse splenocytes after treatment with compounds **15** and **23**.

| Conc. ( $\mu$ M) | % Viability     |
|------------------|-----------------|
| 100              | 29.5 $\pm$ 1.6  |
| 40               | 63.1 $\pm$ 5.8  |
| 16               | 77.7 $\pm$ 4.8  |
| 6.4              | 90.2 $\pm$ 10.7 |
| 2.6              | 86.3 $\pm$ 7.5  |
| 1.0              | 92.7 $\pm$ 4.1  |
| 0.4              | 94.5 $\pm$ 9.1  |

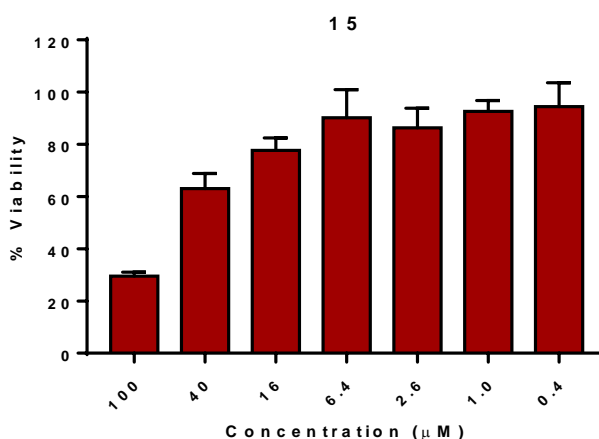

| Conc. ( $\mu$ M) | % Viability    |
|------------------|----------------|
| 100              | 14.1 $\pm$ 3.5 |
| 40               | 43.4 $\pm$ 4.2 |
| 16               | 69.5 $\pm$ 6.4 |
| 6.4              | 84.6 $\pm$ 6.7 |
| 2.6              | 95.0 $\pm$ 4.4 |
| 1.0              | 94.9 $\pm$ 4.0 |
| 0.4              | 97.3 $\pm$ 3.3 |

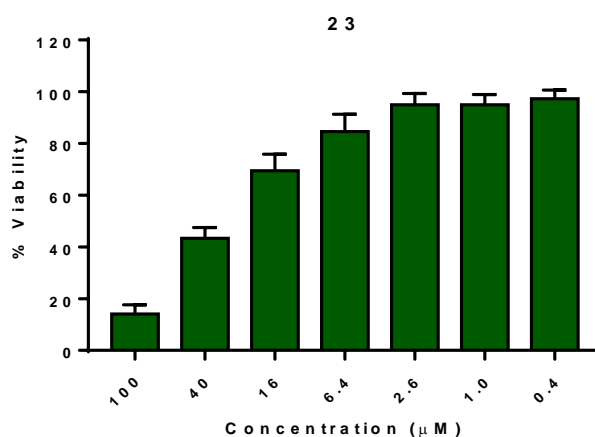

Supplement: s1 [file s1]
